# Supplementary figures and images for: Standardized airway wall thickness Pi10 from routine CT scans of COPD patients as imaging biomarker for disease severity, lung function decline, and mortality
Source: PubMed Central journal article supplement — Ther Adv Respir Dis. 2023 Jan 31;17:17534666221148663. doi: 10.1177/17534666221148663 (PMC9896094; doi:10.1177/17534666221148663), 2023-01-31

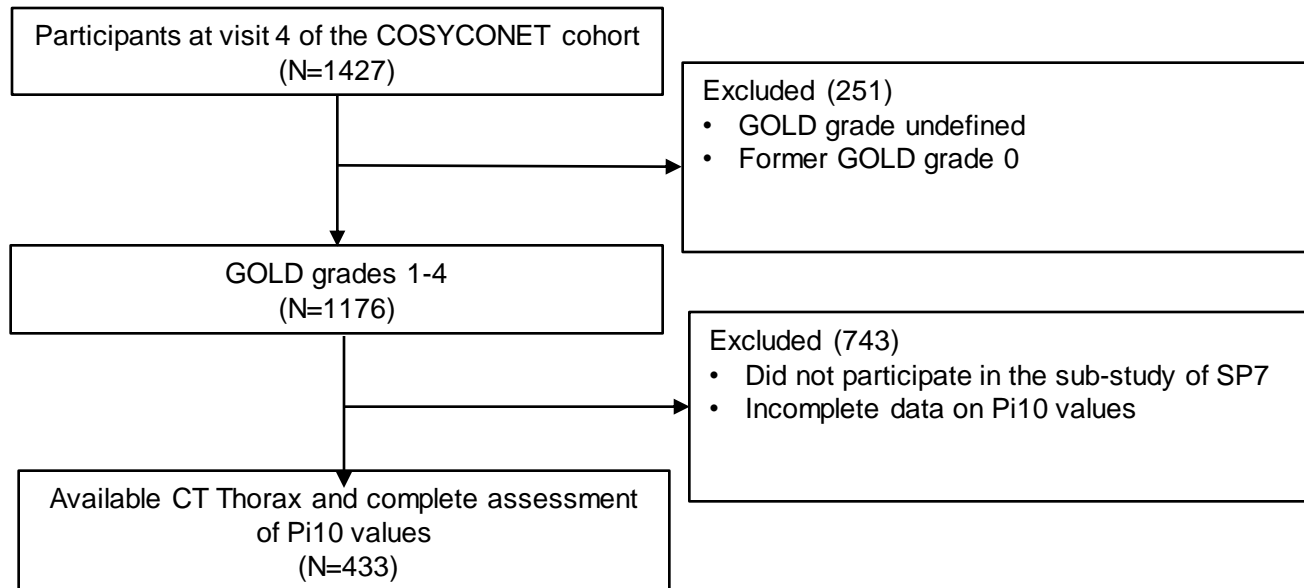

**Figure S1. Flow chart diagram of the study population**

Supplement: sj-pdf-1-tar-10.1177_17534666221148663.pdf [file sj-pdf-1-tar-10.1177_17534666221148663.pdf]
